# Supplementary material for: Dietary Patterns and Risk Factors of Frailty in Lebanese Older Adults
Source: MDPI journal article supplement (doi:10.3390/nu13072188), 2021-06-25
Supplement: s1 [file s1]

## Supplementary Material

**Table S1.** Food groups and food items included in the cluster analysis.

| Food group                                | Food items included                                                                                                               | Portion size used                     |
|-------------------------------------------|-----------------------------------------------------------------------------------------------------------------------------------|---------------------------------------|
| <b>Refined flour products</b>             | All types of bread including Lebanese bread, crisp bread, croissant, "Mankouche" (Lebanese dough-based product)                   | 1 oz of bread or ½ cup cooked cereals |
| <b>Whole cereals and products</b>         | Whole wheat, whole wheat bread, oat breads and bulgur                                                                             |                                       |
| <b>Rice</b>                               | White rice                                                                                                                        |                                       |
| <b>Pizza and pasta</b>                    | Bread equivalent of pizza, pasta                                                                                                  |                                       |
| <b>Corn and breakfast cereals</b>         | Breakfast cereals and corn                                                                                                        |                                       |
| <b>Potato</b>                             | Potatoes and potato products                                                                                                      | ½ cup vegetable                       |
| <b>Raw vegetables</b>                     | Raw green leafy vegetables, tomatoes, cucumbers, mushrooms, sprouts and mixed salad/vegetables                                    |                                       |
| <b>Cooked vegetables</b>                  | Green beans, cooked cruciferous, zucchini, eggplants, carrots, pumpkins, bell peppers, sweet potatoes, green peas, onions, garlic |                                       |
| <b>Fruits</b>                             | Fresh and dried fruits, fresh and bottled fruit juice                                                                             | Usual portion size                    |
| <b>Legumes</b>                            | Lentils, chickpeas and beans, except soya                                                                                         | 1 oz of meat or equivalent            |
| <b>Meat &amp; poultry</b>                 | Beef, veal, lamb/mutton, goat, poultry, organ meat, processed meat from red meat or poultry (e.g. Ham, sausages)                  |                                       |
| <b>Eggs</b>                               | Eggs boiled or fried                                                                                                              |                                       |
| <b>Fish and shellfish</b>                 | Fresh and canned fish, fish products and seafood.                                                                                 |                                       |
| <b>Vegetable oils</b>                     | Vegetable oils including corn, peanut, sunflower, and canola oils, and mayonnaise                                                 | 1 teaspoon equivalent of fat          |
| <b>Olive, seeds and oleaginous fruits</b> | Olives, olive oil, sesame paste ("Tahini") avocado, nuts                                                                          |                                       |
| <b>Processed and saturated fats</b>       | Margarine, ghee and butter                                                                                                        | 1 cup of milk equivalent              |
| <b>Milk &amp; dairy products</b>          | Whole, light, or skimmed liquid milk, processed milk (condensed, dried), dairy dishes, cheeses                                    |                                       |
| <b>Low fat sweets</b>                     | Wafers, "Meghle", gelatin-based dessert, milk-based puddings                                                                      | Usual serving size                    |
| <b>High fat sweets</b>                    | Oriental sweets and baklava, cakes and desserts, chocolate                                                                        |                                       |
| <b>Sugars and jams</b>                    | Sugar and confectionery sugar, jam, marmalade, honey, "Halawa", soft drinks.                                                      | Teaspoon of sugar                     |

**Table S2.** Consumption of predefined food categories according to dietary patterns for men and women separately.

N=352.

|                                                       | Men(N=176)     |                  |                |        | Women (N=176)  |                 |                 |        |
|-------------------------------------------------------|----------------|------------------|----------------|--------|----------------|-----------------|-----------------|--------|
|                                                       | WDP            | HI-MED DP        | MOD-MED DP     | P      | WDP            | HI-MED DP       | MOD-MED DP      | P      |
| <b>Sample</b>                                         | (N=29)         | (N=21)           | (N=126)        |        | (N=13)         | (N=60)          | (N=103)         |        |
| <b>Age(years)</b>                                     | 70 (66-81)     | 79 (71-84)       | 73 (68-79)     | 0.183  | 75 (72-82)     | 71 (67-77)      | 73 (66-78)      | 0.238  |
| <b>Refined cereals products</b>                       | 6.6 (4.3-8.6)  | 5.9 (3-7.7)      | 3.5 (0.9-5.7)  | 0.01   | 4 (2.7-4.8)    | 1.5 (0.6-4.2)   | 3.01 (1.3-4.5)  | 0.002  |
| <b>Whole breads &amp; cereals (including burghul)</b> | 0.4 (0.1-1.1)  | 0.7 (0.3-2.3)    | 1.06 (0.3-2.7) | 0.07   | 1 (0.1-2.3)    | 2.05 (0.4-3.02) | 0.5 (0.2-2.03)  | 0.004  |
| <b>Potato</b>                                         | 0.6 (0.3-0.9)  | 0.4 (0.14-0.6)   | 0.3 (0.1-0.6)  | 0.16   | 0.3 (0.07-0.4) | 0.2 (0.09-0.4)  | 0.2 (0.07-0.3)  | 0.305  |
| <b>Vegetables</b>                                     | 2.8 (2.1-3.5)  | 4.3 (3-5.4)      | 3 (2.2-4.4)    | 0.13   | 3.3 (1.3-4.7)  | 3.6 (2.5-5.2)   | 2.8 (2-4.9)     | 0.071  |
| <b>Fruits</b>                                         | 1.9(1.1-2.9)   | 3.01 (2.5-3.9)   | 2.1 (1.2-3.01) | 0.01   | 2.4 (1.5-2.7)  | 2 (1.4-3.3)     | 1.8 (1.4-2.6)   | 0.099  |
| <b>Legumes</b>                                        | 0.4 (0.2-0.9)  | 0.9 (0.6-1.15)   | 0.3 (0.13-0.6) | 0.03   | 0.3 (0.2-0.6)  | 0.6 (0.2-0.9)   | 0.3 (0.07-0.6)  | 0.129  |
| <b>Meat &amp; Poultry</b>                             | 2.6 (1.7-4.1)  | 3 (2.5-3.7)      | 2.1 (1.03-3.1) | 0.01   | 1.6 (1.4-2.3)  | 1.9 (1.4-2.5)   | 1.8 (1.3-2.7)   | 0.445  |
| <b>Eggs</b>                                           | 0.6 (0.3-0.9)  | 0.4 (0.3-0.7)    | 0.3 (0.1-0.6)  | 0.06   | 0.3 (0.1-0.9)  | 0.3 (0.1-0.5)   | 0.3 (0.07-0.5)  | 0.502  |
| <b>Fish &amp; shellfish</b>                           | 0.4 (0.1-0.8)  | 0.5 (0.2-1.2)    | 0.4 (0.2-0.9)  | 0.95   | 0.4 (0.3-0.5)  | 0.4 (0.2-0.8)   | 0.2 (0.1-0.6)   | 0.071  |
| <b>Milk and Dairy products</b>                        | 1.8 (1.2-2.2)  | 2.4 (1.1-3.06)   | 1.3 (0.8-1.9)  | 0.03   | 2.3 (1-3.3)    | 1.6 (0.99-2.07) | 1.45 (0.9-2.2)  | 0.061  |
| <b>Vegetable oils</b>                                 | 2 (0.7-4)      | 3 (1-6)          | 3 (1.8-3)      | 0.17   | 3 (2-3)        | 3 (1.5-3.2)     | 3 (2-3.4)       | 0.829  |
| <b>Olive, seeds and oleaginous fruits</b>             | 3.4 (3-5.03)   | 12.4 (10.7-15.4) | 5 (3.4-6.8)    | <0.001 | 4.4 (3.4-6.4)  | 9 (7.3-11.7)    | 3.8 (3-4.8)     | <0.001 |
| <b>Processed and saturated fats</b>                   | 0.14 (0-1.2)   | 0 (0-0.4)        | 0 (0-0.2)      | 0.05   | 0 (0-0.6)      | 0 (0-0.14)      | 0 (0-0.14)      | 0.722  |
| <b>Low Fat Sweets</b>                                 | 0.3 (0.04-1.4) | 0.6 (0.13-1.1)   | 0.08 (0-0.3)   | 0.02   | 1.1 (0.5-2.3)  | 0.37 (0.08-1.9) | 0.18 (0.02-0.5) | 0.002  |
| <b>High Fat Sweets</b>                                | 0.2 (0.07-0.6) | 0.3 (0.01-0.7)   | 0.06 (0-0.2)   | 0.01   | 0.2 (0.1-0.3)  | 0.12 (0-0.3)    | 0.07 (0-0.3)    | 0.074  |
| <b>Sugars and jams</b>                                | 7.1 (5.4-9.4)  | 4 (2.4-6.7)      | 1 (0.2-2.1)    | <0.001 | 13 (9.7-18)    | 2.6 (0.8-4.05)  | 1.07 (0.14-2.1) | <0.001 |

Numeric variables are represented as median (interquartile range).

Abbreviations: WDP: Westernized dietary pattern; Hi-Med DP: high-intake Mediterranean dietary pattern; MOD-Med: moderate-intake Mediterranean dietary pattern.

**Table S3.** Nutritional characteristics of the dietary patterns.

|                            | Total sample (N=352)  |                        |                       |                  | Men (N=176)            |                      |                         |                  | Women (N=176)          |                        |                      |                  |
|----------------------------|-----------------------|------------------------|-----------------------|------------------|------------------------|----------------------|-------------------------|------------------|------------------------|------------------------|----------------------|------------------|
|                            | WDP                   | HI-MED DP              | MOD-MED DP            | P-value          | WDP                    | HI-MED DP            | MOD-MED DP              | P-value          | WDP                    | HI-MED DP              | MOD-MED DP           | P-value          |
| <b>Calories/d</b>          | 2261<br>(1968-2838)   | 2028<br>(1652-2451)    | 1743<br>(1457-2122)   | <b>&lt;0.001</b> | 2264<br>(2151-2864)    | 3017<br>(2033-3317)  | 1832<br>(1543-2277)     | <b>&lt;0.001</b> | 1968<br>(1423-2625)    | 1886<br>(1582.5-2298)  | 1627<br>(1350-1853)  | <b>0.001</b>     |
| <b>KCal/kg BW</b>          | 31.2<br>(27.2-36.5)   | 28.2<br>(22.6-36.2)    | 24<br>(18.6-29)       | <b>&lt;0.001</b> | 30.5<br>(27.2-34.9)    | 34.3<br>(28.2-42.8)  | 24.49<br>(18.95-28.55)  | <b>&lt;0.001</b> | 32.64<br>(21.49-36.46) | 26.49<br>(22.15-35.28) | 23.7<br>(17.7-29.6)  | <b>0.003</b>     |
| <b>Protein (g)/d</b>       | 78.65<br>(70.4-98.7)  | 67.9<br>(53.7-89.6)    | 63.6<br>(47.8-78.2)   | <b>&lt;0.001</b> | 80.2<br>(73.4-99.1)    | 94.1<br>(66.8-116)   | 68.3<br>(53.2-86.4)     | <b>&lt;0.001</b> | 70.4<br>(46-83.2)      | 65.45<br>(51.3-82.55)  | 56.4<br>(44.9-68.7)  | <b>0.08</b>      |
| <b>Protein (g)/kg BW</b>   | 1.1<br>(0.9-1.3)      | 0.95<br>(0.7-1.3)      | 0.87<br>(0.6-1.08)    | <b>&lt;0.001</b> | 1.1<br>(0.9-1.3)       | 1.2<br>(0.9-1.5)     | 0.91<br>(0.7-1.07)      | <b>0.001</b>     | 1<br>(0.67-1.27)       | 0.9<br>(0.71-1.23)     | 0.8<br>(0.6-1.1)     | <b>0.08</b>      |
| <b>Carbohydrates (g)/d</b> | 285<br>(229-331)      | 206<br>(166-261)       | 188<br>(155-241)      | <b>&lt;0.001</b> | 294<br>(247-318)       | 344<br>(224-359)     | 203.5<br>(169-255)      | <b>&lt;0.001</b> | 229<br>(163-335)       | 198<br>(157.5-213.5)   | 175<br>(139-215)     | <b>0.022</b>     |
| <b>Fat (g) /d</b>          | 102<br>(83.5-121)     | 106<br>(86.8-138)      | 81.1<br>(69.4-102)    | <b>&lt;0.001</b> | 104<br>(87.8-119)      | 136<br>(90.2-162)    | 82.75<br>(71-108)       | <b>&lt;0.001</b> | 90.7<br>(66.2-121)     | 101.5<br>(83.8-126)    | 79.3<br>(64.4-93.5)  | <b>&lt;0.001</b> |
| <b>MUFA (%TEI)</b>         | 16.81<br>(14.7-18.6)  | 21.8<br>(19.1-25.1)    | 18.5<br>(16.1-21.3)   | <b>&lt;0.001</b> | 15.4<br>(14.5-18.1)    | 19<br>(16.8-22.6)    | 18.35<br>(16.1-20.8)    | <b>0.005</b>     | 17.9<br>(16-18.6)      | 22.8<br>(19.9-25.4)    | 18.9<br>(16.2-21.6)  | <b>&lt;0.001</b> |
| <b>PUFA (%TEI)</b>         | 7.65<br>(6-9)         | 9<br>(7.3-10.6)        | 8.6<br>(7.5-10.4)     | <b>&lt;0.001</b> | 6.8<br>(5.7-8.7)       | 9.3<br>(7.7-9.9)     | 8.5<br>(7.5-10.1)       | <b>0.003</b>     | 8.1<br>(6.2-9.2)       | 8.95<br>(7.3-11.1)     | 8.7<br>(7.43-10.7)   | <b>0.204</b>     |
| <b>SAFA (%TEI)</b>         | 12<br>(10.5-13.6)     | 12.2<br>(11-13.9)      | 12.2<br>(10.3-14.1)   | <b>0.66</b>      | 12.2<br>(9.9-14.1)     | 11.6<br>(10.6-12.7)  | 11.75<br>(9.9-13.6)     | <b>0.838</b>     | 11.7<br>(11.1-12.9)    | 12.4<br>(11.15-14.5)   | 12.97<br>(11.1-14.6) | <b>0.438</b>     |
| <b>ω3 FA (g/d)</b>         | 0.6455<br>(0.52-0.81) | 0.96<br>(0.61-1.35)    | 0.62<br>(0.477-0.88)  | <b>&lt;0.001</b> | 0.68<br>(0.57-0.96)    | 1<br>(0.7-1.68)      | 0.7105<br>(0.51-0.93)   | <b>0.03</b>      | 0.63<br>(0.41-0.69)    | 0.95<br>(0.585-1.245)  | 0.54<br>(0.44-0.733) | <b>&lt;0.001</b> |
| <b>ω6/ω3 ratio</b>         | 19.27<br>(12.5-24.34) | 15.27<br>(11.11-20.87) | 20.7<br>(13.26-24.57) | <b>0.002</b>     | 16.89<br>(11.05-24.34) | 16.44<br>(12.5-19.2) | 18.645<br>(12.34-23.94) | <b>0.408</b>     | 20.8<br>(13.3-24.34)   | 14.75<br>(10.86-22.19) | 22.4<br>(15.5-25.2)  | <b>0.001</b>     |
| <b>Fibers (g/d)</b>        | 19.95<br>(16-23.6)    | 21.2<br>(17.3-28.2)    | 17.8<br>(13.7-23.9)   | <b>&lt;0.001</b> | 20.5<br>(18.7-23.8)    | 30.3<br>(19.3-35.2)  | 19.2<br>(14.7-25.8)     | <b>0.001</b>     | 18.2<br>(13.4-21.8)    | 20.35<br>(16.95-25.8)  | 16.4<br>(12.7-19.8)  | <b>0.001</b>     |

Numeric variables are reported as median (interquartile range).

Abbreviations: WDP: Westernized dietary pattern; Hi-Med DP: high-intake Mediterranean dietary pattern; MOD-Med: moderate-intake Mediterranean dietary pattern; Kcal/d: Calories per day; Calories/kg BW: Calories per kg body weight; Protein/kg BW: Proteins per kg body weight; MUFA: mono-unsaturated fat acids; %TEI: percentage total energy intake; PUFA: poly-unsaturated fatty acids; SAFA: saturated fatty acids; FA: fatty acids; ω6/ω3 ratio: omega-6 polyunsaturated fatty acids/omega-3 polyunsaturated fatty acids ratio.
